# Supplementary material for: The comparison of meat yield, quality, and flavor between small-tailed Han sheep and two crossbred sheep and the verification of related candidate genes
Source: Front Nutr. 2024 Aug 1;11:1399390. doi: 10.3389/fnut.2024.1399390 (PMC11324605; doi:10.3389/fnut.2024.1399390)
Supplement: Supplementary file 7 [file Table_7.XLSX]

## Sheet: Sheet1
						Correlation in Han sheep
		PPARG(MLD)	PDK4(MLD)	IMF	Myristate	Palmitic acid	palmitoleic acid	Margaric acid	Stearic acid	Oleic acid	Linoleic acid	Arachidonic acid
PPARG(MLD)	Pearson(R)	1	-0.187	0.548	0.643	0.613	0.606	-0.115	-0.566	0.475	-0.366	-0.366
	Significance(P)		0.723	0.261	0.168	0.196	0.202	0.829	0.242	0.341	0.476	0.475
	N	6	6	6	6	6	6	6	6	6	6	6
PDK4(MLD)	Pearson(R)	-0.187	1	-0.452	-0.633	-0.562	-0.599	-0.545	0.468	-0.498	0.406	0.371
	Significance(P)	0.723		0.368	0.177	0.246	0.209	0.263	0.35	0.315	0.424	0.47
	N	6	6	6	6	6	6	6	6	6	6	6
IMF	Pearson(R)	0.548	-0.452	1	0.631	.958**	.954**	-0.358	-0.11	.864*	-.875*	-.919**
	Significance(P)	0.261	0.368		0.179	0.003	0.003	0.486	0.836	0.026	0.022	0.01
	N	6	6	6	6	6	6	6	6	6	6	6
Myristate	Pearson(R)	0.643	-0.633	0.631	1	0.785	0.694	-0.101	-0.385	.861*	-0.753	-0.684
	Significance(P)	0.168	0.177	0.179		0.065	0.126	0.849	0.451	0.027	0.084	0.134
	N	6	6	6	6	6	6	6	6	6	6	6
Palmitic acid	Pearson(R)	0.613	-0.562	.958**	0.785	1	.980**	-0.253	-0.31	.926**	-.873*	-.892*
	Significance(P)	0.196	0.246	0.003	0.065		0.001	0.628	0.55	0.008	0.023	0.017
	N	6	6	6	6	6	6	6	6	6	6	6
palmitoleic acid	Pearson(R)	0.606	-0.599	.954**	0.694	.980**	1	-0.127	-0.387	.838*	-0.78	-.818*
	Significance(P)	0.202	0.209	0.003	0.126	0.001		0.81	0.448	0.037	0.067	0.047
	N	6	6	6	6	6	6	6	6	6	6	6
Margaric acid	Pearson(R)	-0.115	-0.545	-0.358	-0.101	-0.253	-0.127	1	-0.6	-0.423	0.542	0.56
	Significance(P)	0.829	0.263	0.486	0.849	0.628	0.81		0.208	0.403	0.266	0.248
	N	6	6	6	6	6	6	6	6	6	6	6
Stearic acid	Pearson(R)	-0.566	0.468	-0.11	-0.385	-0.31	-0.387	-0.6	1	-0.09	-0.137	-0.142
	Significance(P)	0.242	0.35	0.836	0.451	0.55	0.448	0.208		0.865	0.795	0.788
	N	6	6	6	6	6	6	6	6	6	6	6
Oleic acid	Pearson(R)	0.475	-0.498	.864*	.861*	.926**	.838*	-0.423	-0.09	1	-.970**	-.950**
	Significance(P)	0.341	0.315	0.026	0.027	0.008	0.037	0.403	0.865		0.001	0.004
	N	6	6	6	6	6	6	6	6	6	6	6
Linoleic acid	Pearson(R)	-0.366	0.406	-.875*	-0.753	-.873*	-0.78	0.542	-0.137	-.970**	1	.990**
	Significance(P)	0.476	0.424	0.022	0.084	0.023	0.067	0.266	0.795	0.001		0
	N	6	6	6	6	6	6	6	6	6	6	6
Arachidonic acid	Pearson(R)	-0.366	0.371	-.919**	-0.684	-.892*	-.818*	0.56	-0.142	-.950**	.990**	1
	Significance(P)	0.475	0.47	0.01	0.134	0.017	0.047	0.248	0.788	0.004	0
	N	6	6	6	6	6	6	6	6	6	6	6
** P＜0.01
* P＜0.05
